# Supplementary material
Source: publisher figshare collection journal article supplement (https://springernature.figshare.com/ndownloader/files/22053657)

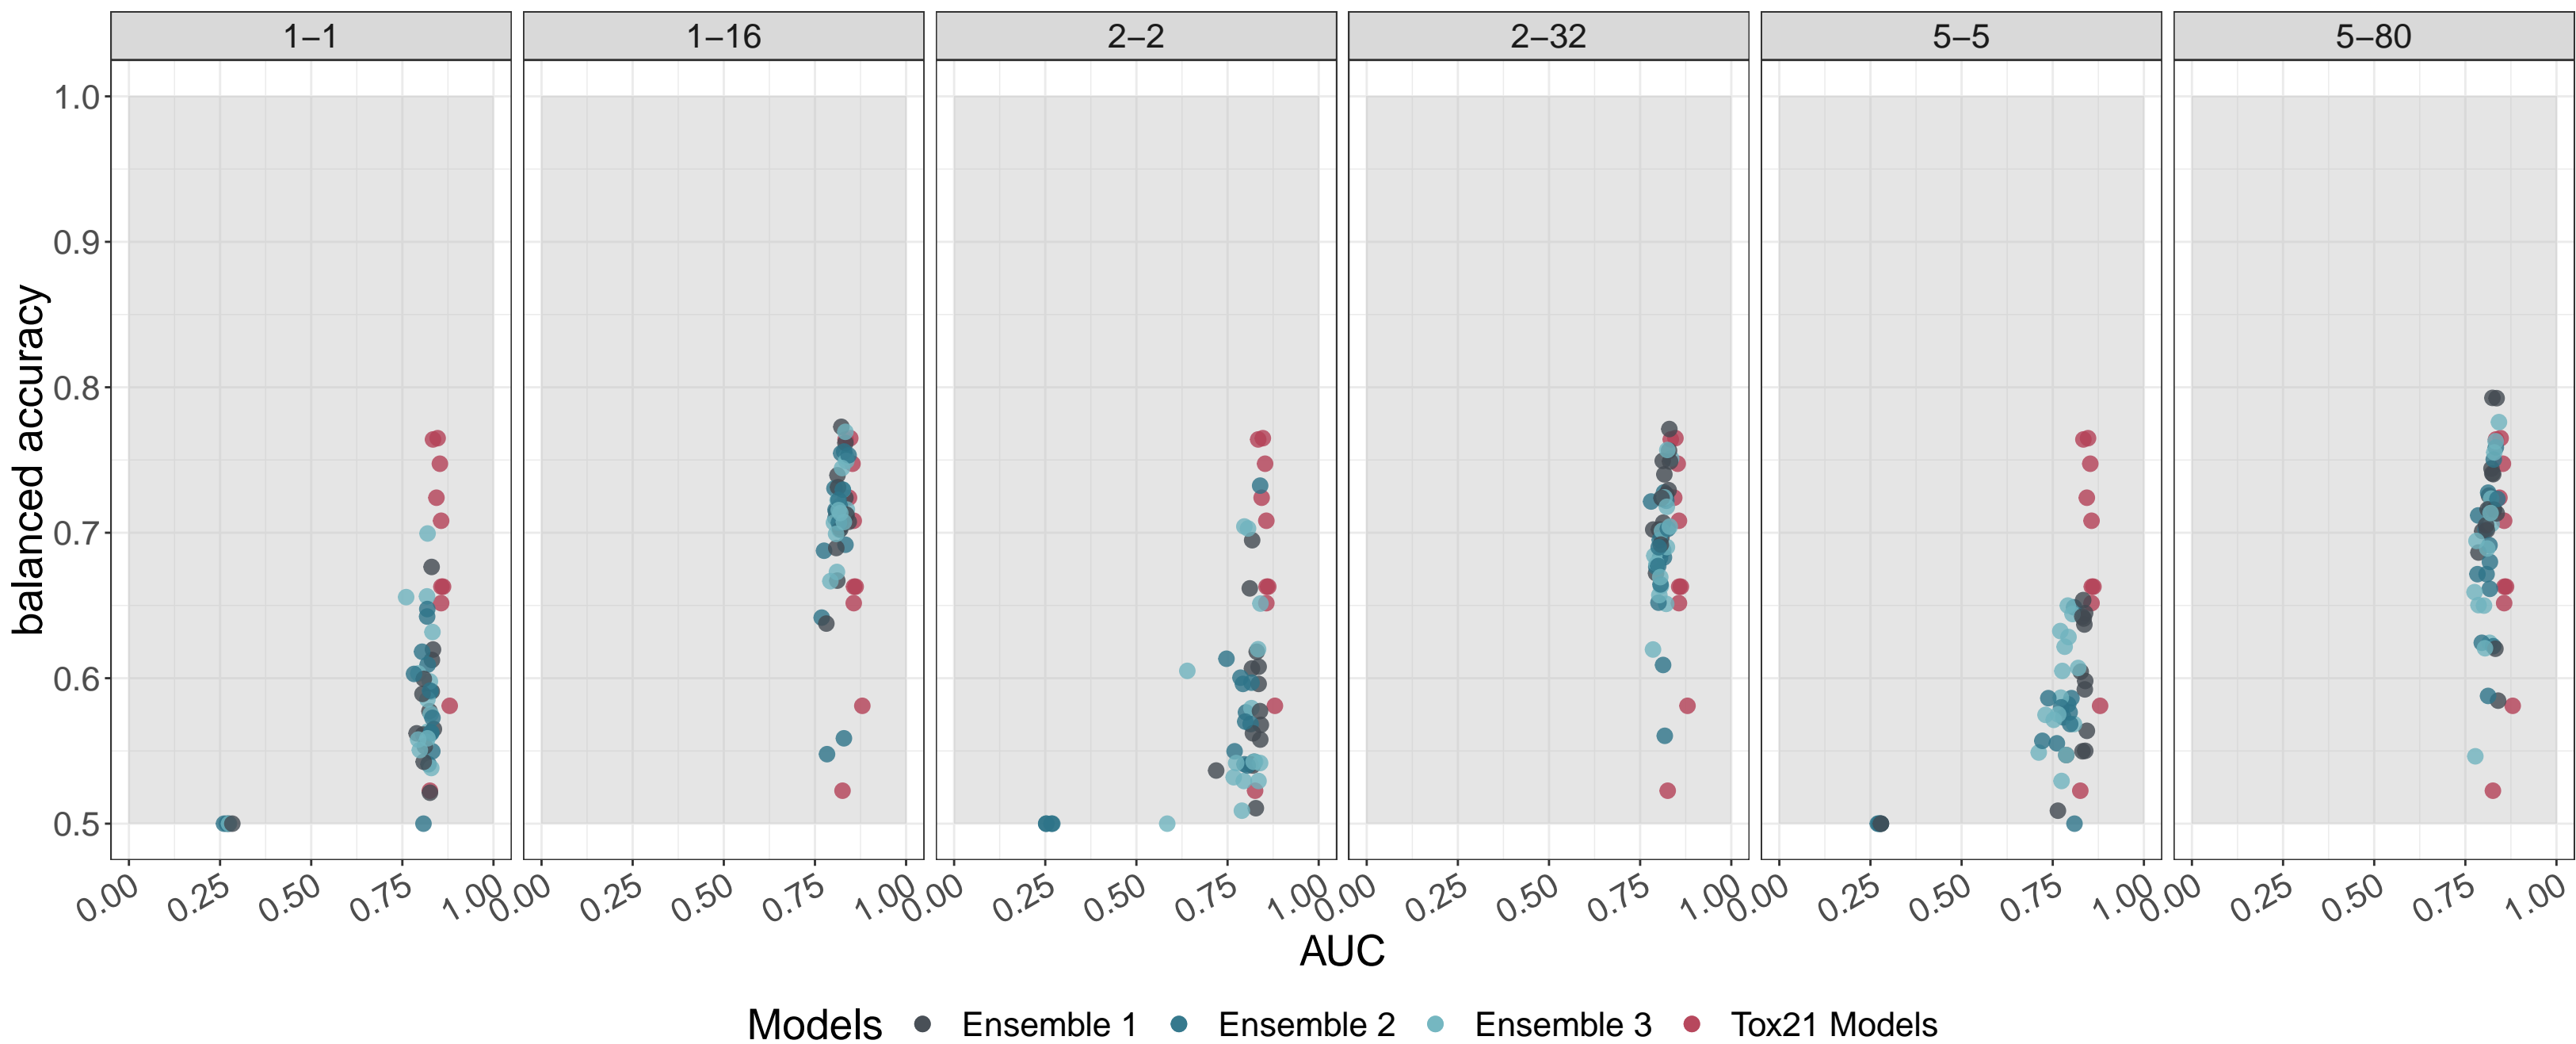

Supplement: Supplementary file 1 [file 22053657]

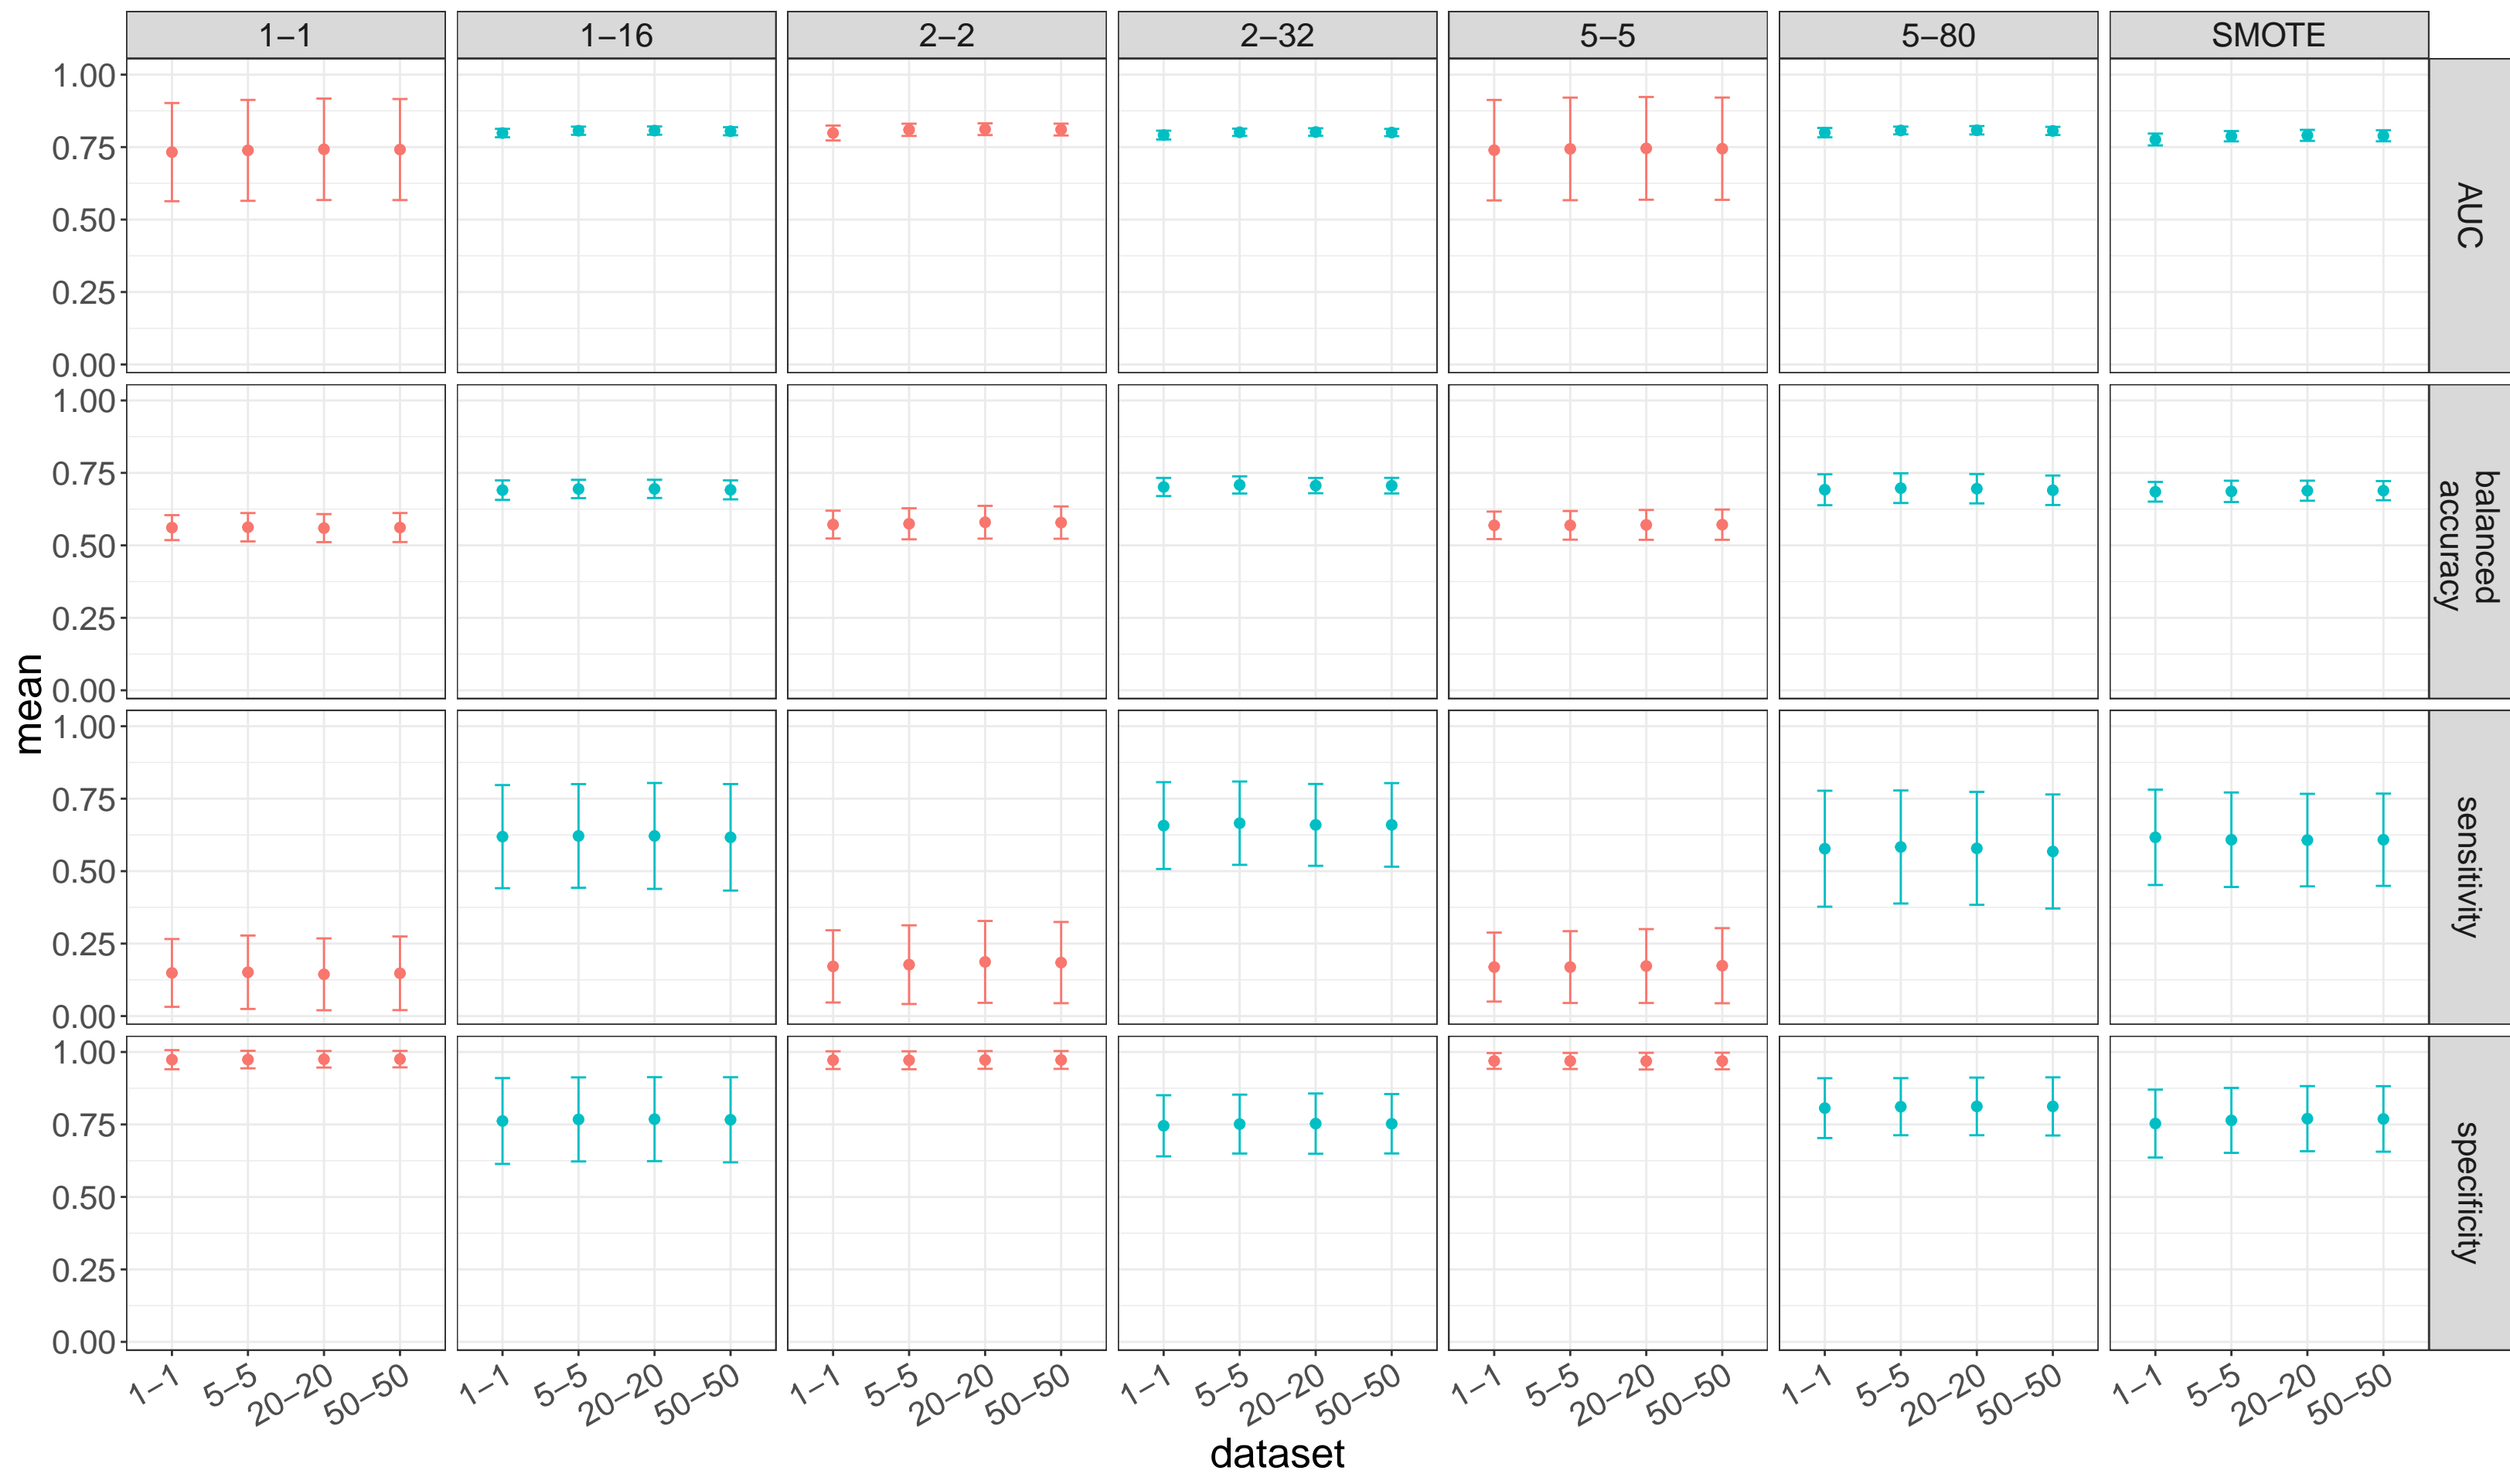

Supplement: Supplementary file 2 [file 22053657]

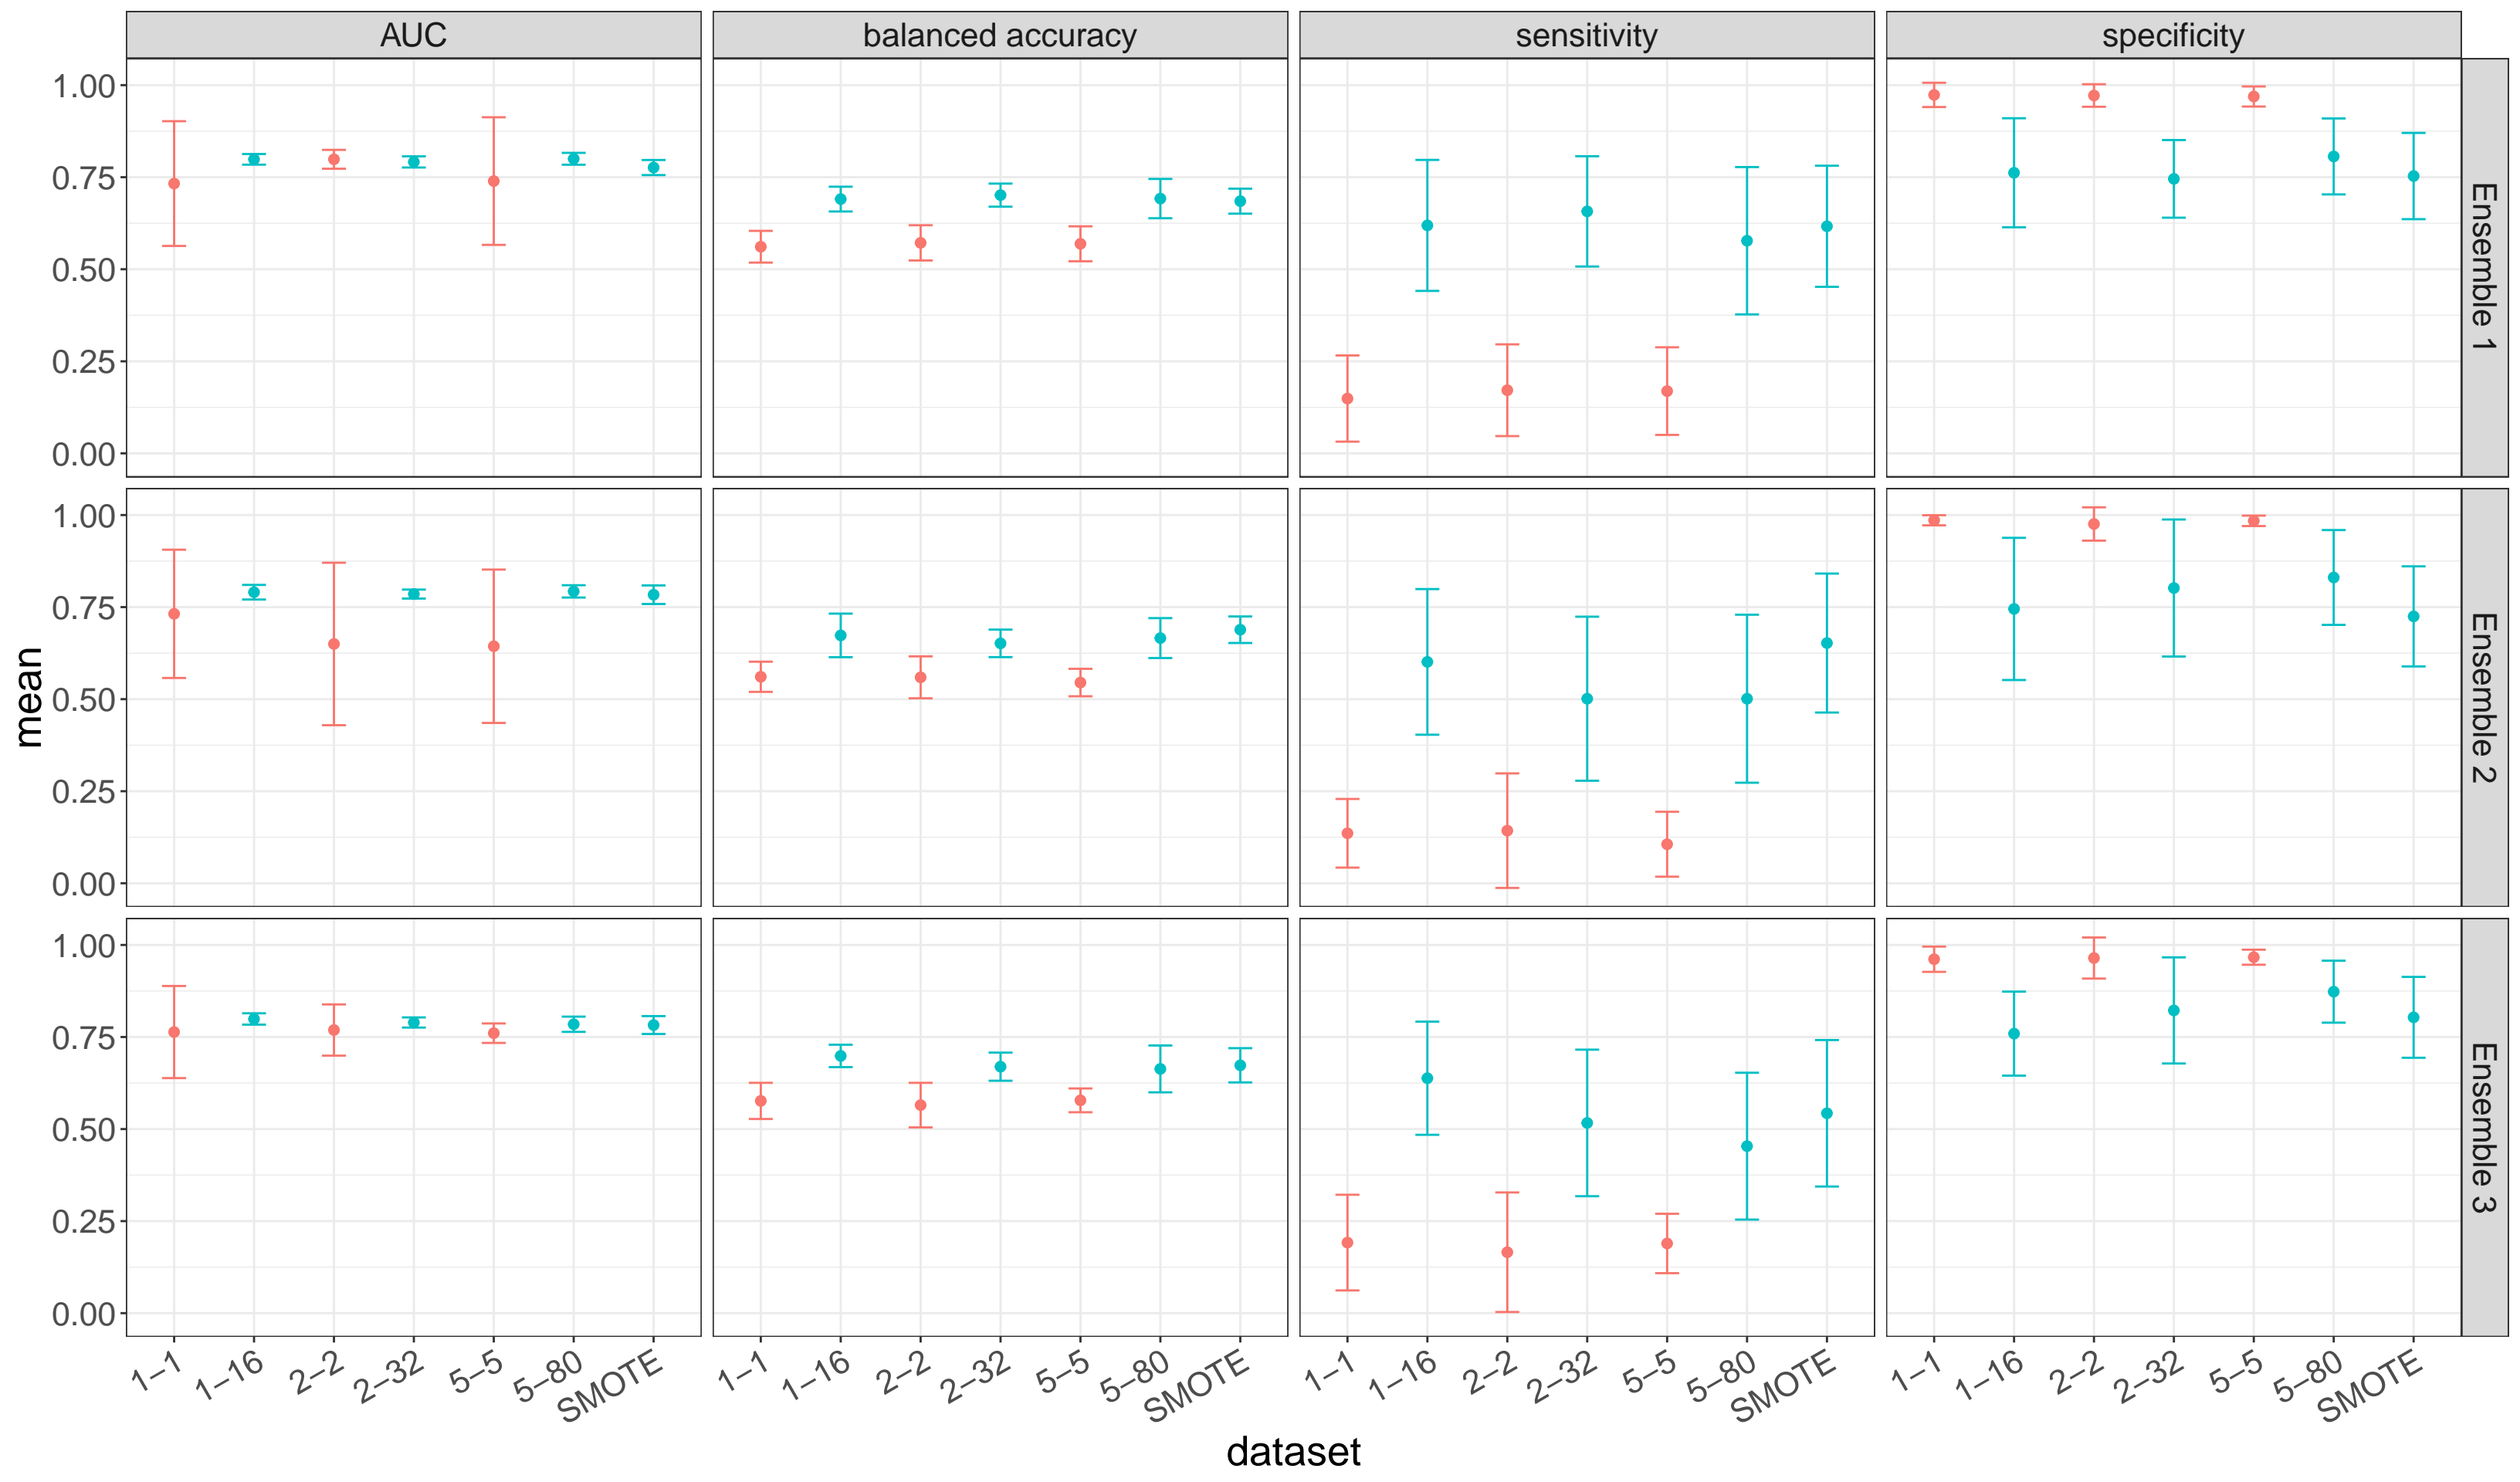

Supplement: Supplementary file 3 [file 22053657]
